# Supplementary material for: Legionella Diversity and Spatiotemporal Variation in the Occurrence of Opportunistic Pathogens within a Large Building Water System
Source: MDPI journal article supplement (doi:10.3390/pathogens9070567), 2020-07-13

Supplementary Materials

# ***Legionella* Diversity and Spatiotemporal Variation in the Occurrence of Opportunistic Pathogens within a Large Building Water System**

Helen Y. Buse <sup>1,\*</sup>, Brian J. Morris <sup>2</sup>, Vicente Gomez-Alvarez <sup>3</sup>, Jeffrey G. Szabo <sup>1</sup>, and John S. Hall <sup>1</sup>

<sup>1</sup> Homeland Security and Materials Management Division, Center for Environmental Solutions & Emergency Response (CESER), Office of Research and Development (ORD), US Environmental Protection Agency (USEPA), Cincinnati, OH 45268, USA

<sup>2</sup> Pegasus Technical Services, Inc c/o US EPA, Cincinnati, OH 45268, USA

<sup>3</sup> Water Infrastructure Division, Center for Environmental Solutions & Emergency Response (CESER), US Environmental Protection Agency (USEPA), Office of Research and Development (ORD), Cincinnati, OH 45268, USA

\* Correspondence: buse.helen@epa.gov; Tel.: +1-513-569-7930

Received: 8 June 2020; Accepted: 7 July 2020; Published: date

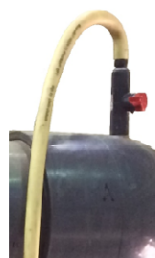

**PVC-MA**

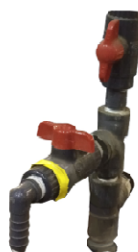

**PVC-R**

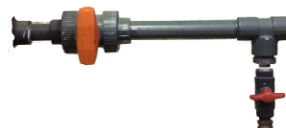

**PVC-FC**

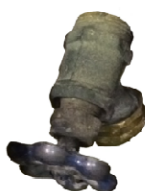

**Spigot**

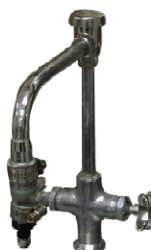

**Faucet**

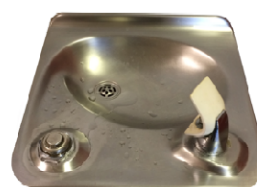

**Fountain**

**Figure S1.** Images of sampling outlets at each location

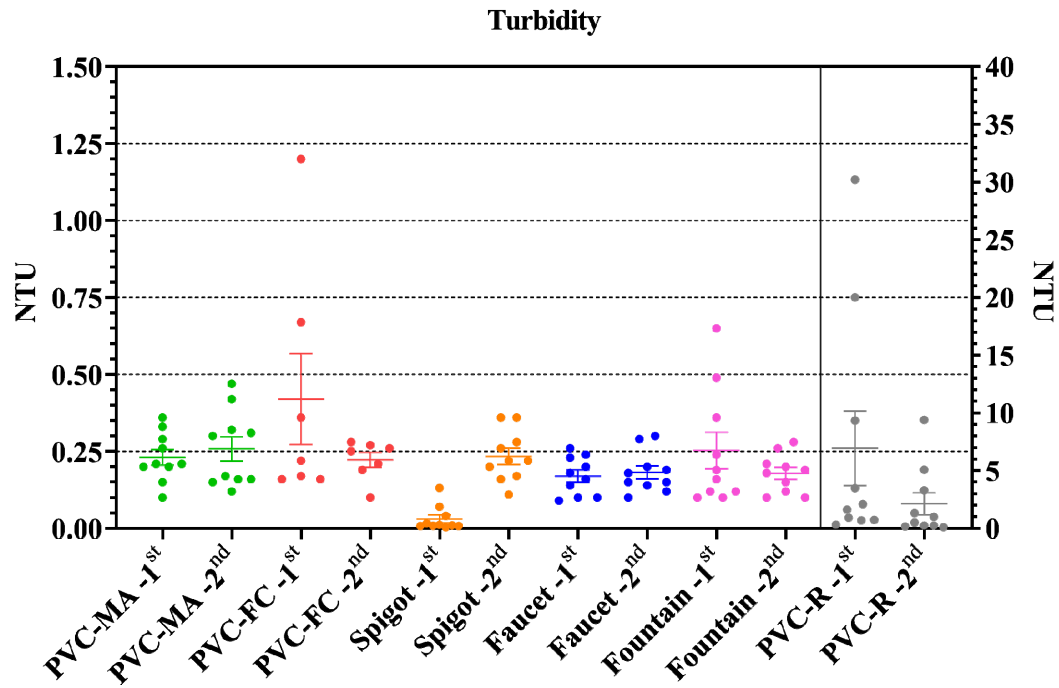

**Figure S2.** Scatterplot of turbidity measurements for bulk water.

Mean and standard error mean lines are shown for turbidity measurements at each site for all sampling time points. PVC-R -1<sup>st</sup> and -2<sup>nd</sup> samples are plotted on the right y-axis. All other samples are plotted on the left y-axis.

(a)

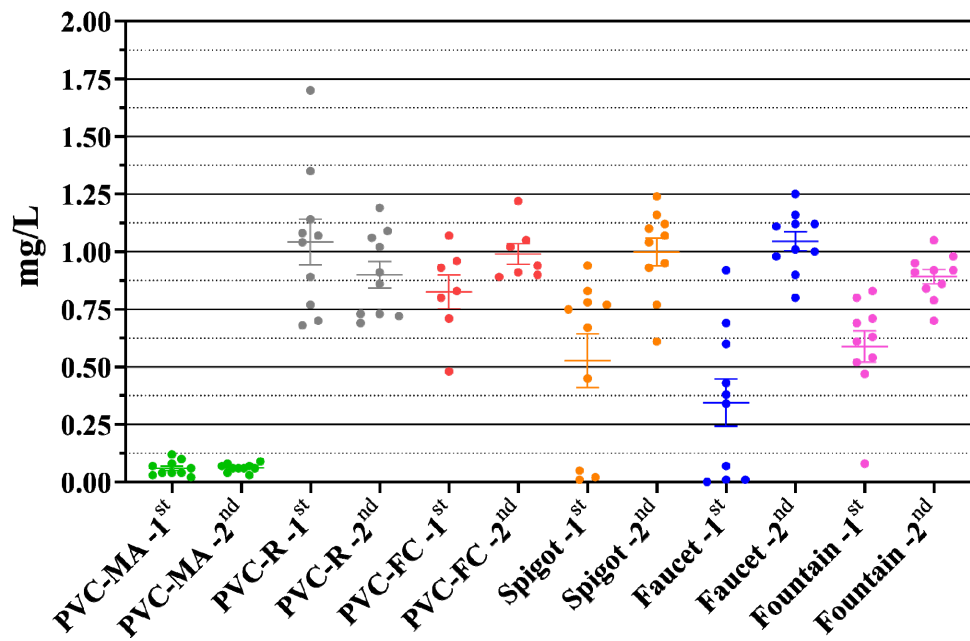

(b)

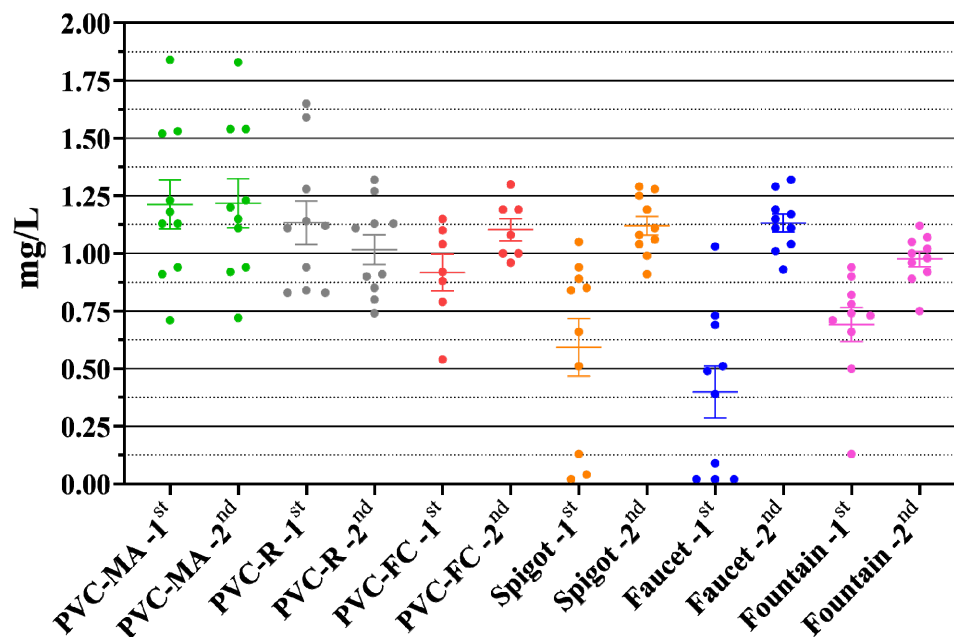

**Figure S3.** Scatterplot of chlorine measurements for bulk water

Mean and standard error mean are shown for free (a) and total (b) chlorine measurements at each site for all sampling time points. 1<sup>st</sup>, first draw bulk water samples. 2<sup>nd</sup>, second draw/post-flushing bulk water samples.

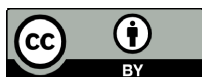

Supplement: s1 [file s1]
